# Supplementary material
Source: PubMed Central journal article supplement (PMC4542911)
Supplement: supp_civ229_civ229supp_fig1.pdf [file supp_civ229_civ229supp_fig1.pdf]

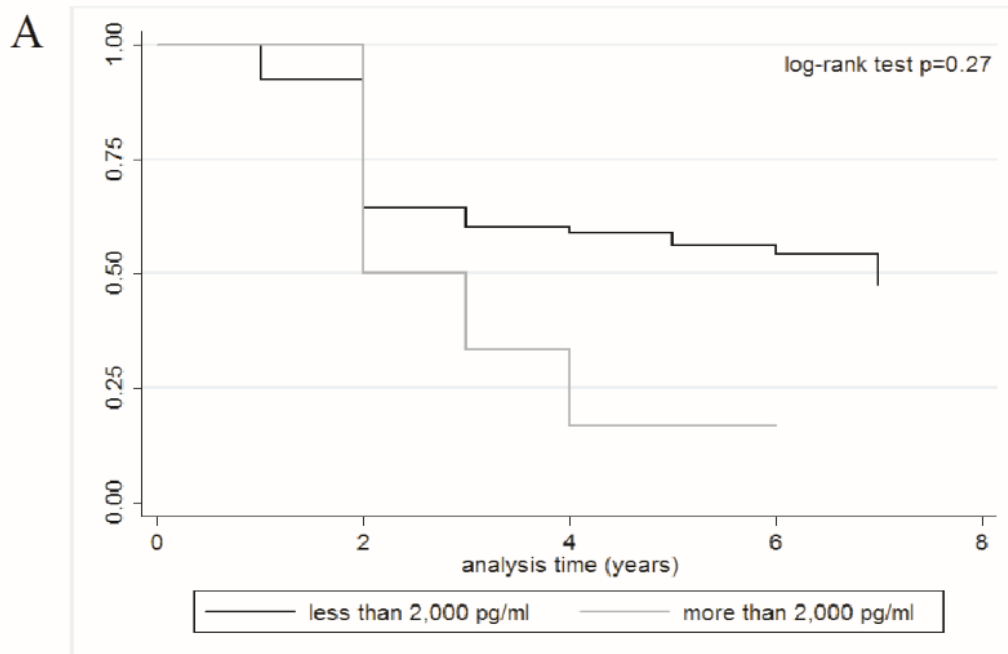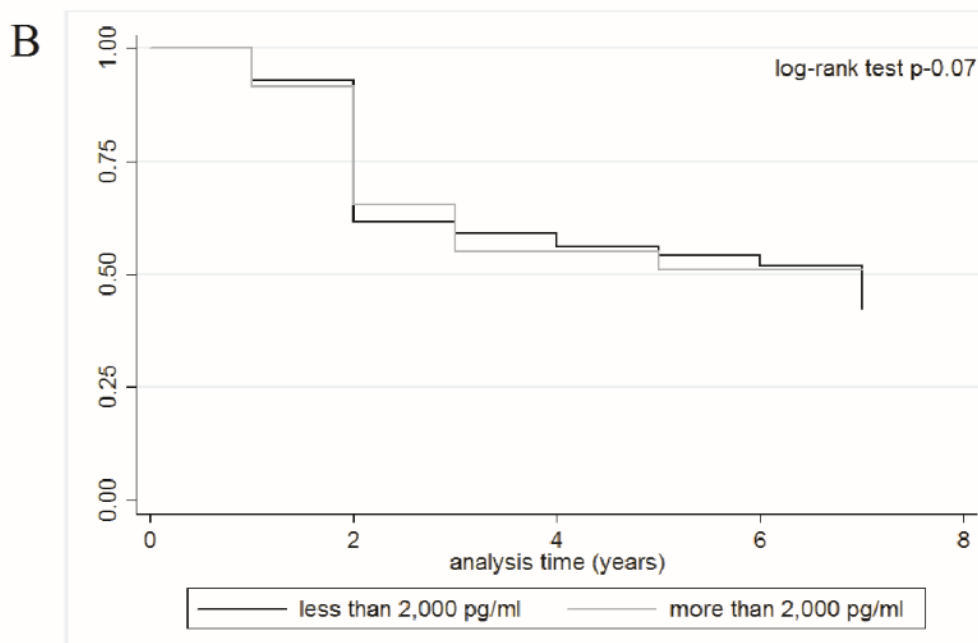

**Figure 1 S.** Kaplan-Meier survival curve analysis in asymptomatic HTLV-1 individuals based on EDSS worse of at least one point and stratified by spontaneous production of TNF- $\alpha$  (A) and IFN- $\gamma$  (B) (n=164).
