# Supplementary material
Source: PubMed Central journal article supplement (PMC4542911)
Supplement: supp_civ229_civ229supp_fig2.pdf [file supp_civ229_civ229supp_fig2.pdf]

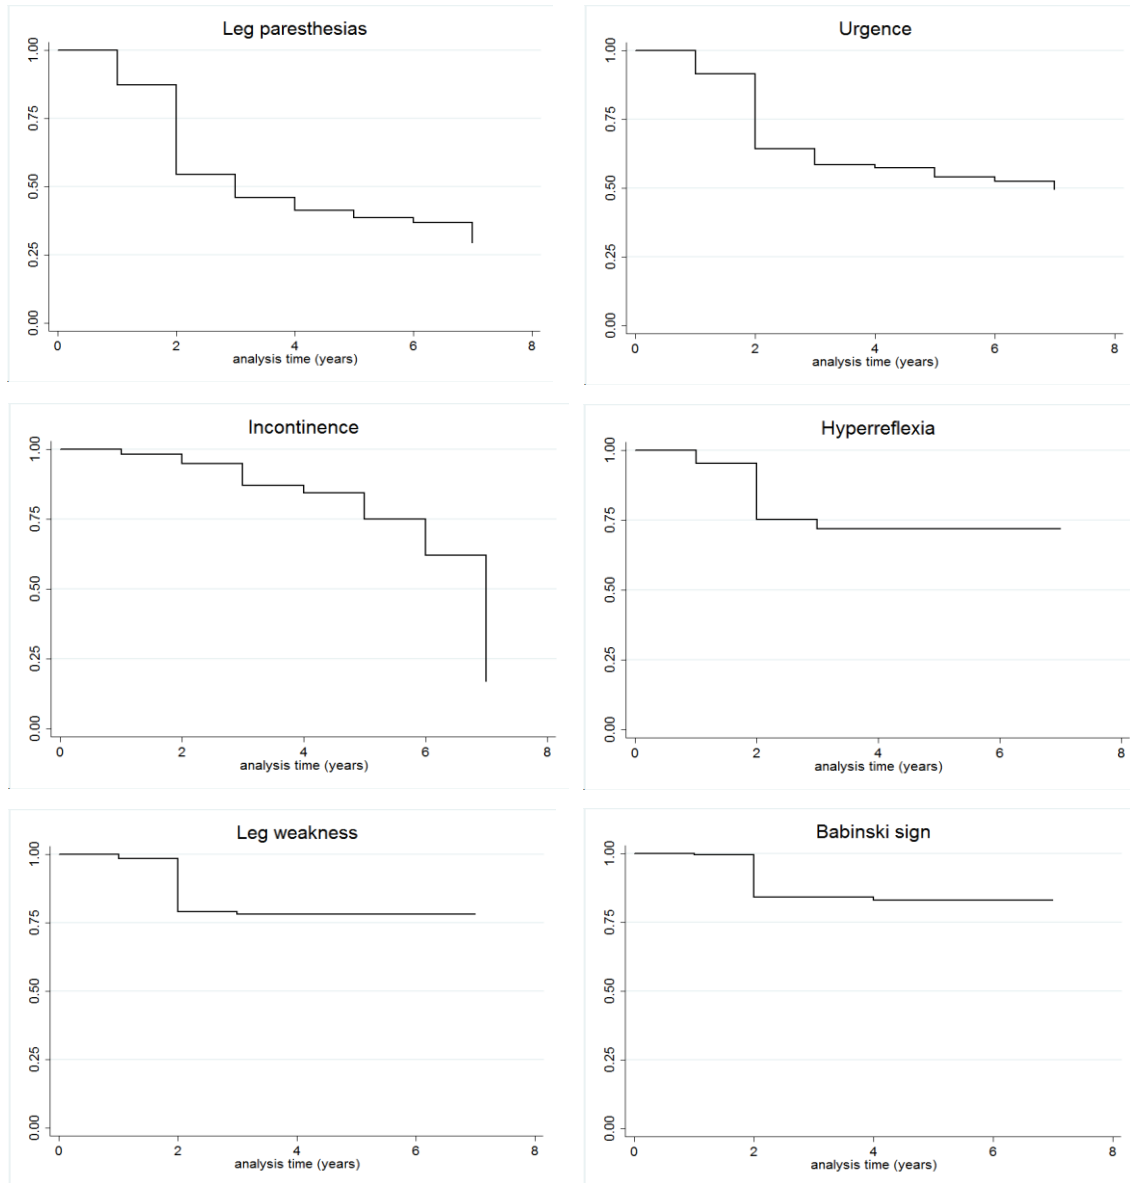

**Figure 2 S.** Kaplan-Meier curves for incidence of neurological symptoms and signs in HTLV-1-infected subjects who were asymptomatic at study entry (n=251).
